# Supplementary material for: A Graphene-Based Biosensing Platform Based on Regulated Release of an Aptameric DNA Biosensor
Source: PubMed Central journal article supplement (PMC4701278; doi:10.3390/s151128244), 2015-11-09
Supplement: sensors-15-28244-s001.pdf [file sensors-15-28244-s001.pdf]

*Supplementary Information***A Graphene-Based Biosensing Platform Based on Regulated Release of an Aptameric DNA Biosensor. *Sensors* 2015, 15, 28244-28256**Yu Mao <sup>1,2</sup>, Yongli Chen <sup>1,2</sup>, Song Li <sup>1</sup>, Shuo Lin <sup>1,3</sup> and Yuyang Jiang <sup>2,\*</sup>

<sup>1</sup> Laboratory of Chemical Genomics, School of Chemical Biology and Biotechnology, Peking University Shenzhen Graduate School, Shenzhen 518055, China; E-Mails: maoyu\_gt@126.com, (Y.M.); chen Yongli0617@163.com (Y.C.); lisong@pkusz.edu.cn (S.L.); shuolin@ucla.edu (S.L.)

<sup>2</sup> The Ministry-Province Jointly Constructed Base for State Key Lab-Shenzhen Key Laboratory of Chemical Biology, the Graduate School at Shenzhen, Tsinghua University, Shenzhen 518055, China

<sup>3</sup> Department of Molecular, Cell and Developmental Biology, University of California, Los Angeles, CA 90095, USA

\* Author to whom correspondence should be addressed; E-Mail: jiangyy@sz.tsinghua.edu.cn; Tel./Fax: +86-755-2603-2094.

**Table S1.** DNA oligonucleotides used in the study.

| Name            | Sequence (5'-3')                                                                                |
|-----------------|-------------------------------------------------------------------------------------------------|
| FAM-labeled DNA | (FAM)-TCCAACCCGCCCTACCCAC <b><i>CGCTGAGG</i></b><br><b><i>ACCTGGGGGAGTATTGCGGAGGAAGGTCC</i></b> |
| CPDNA8          | CGGGTTGG                                                                                        |
| CPDNA10         | GGCGGGTTGG                                                                                      |
| CPDNA12         | AGGGCGGGTTGG                                                                                    |
| CPDNA14         | GTAGGGCGGGTTGG                                                                                  |

The segments shown in bold-italic letters are the Nt.BbvCI recognition sequence and underlined-italic letters are the ATP aptamer sequence.

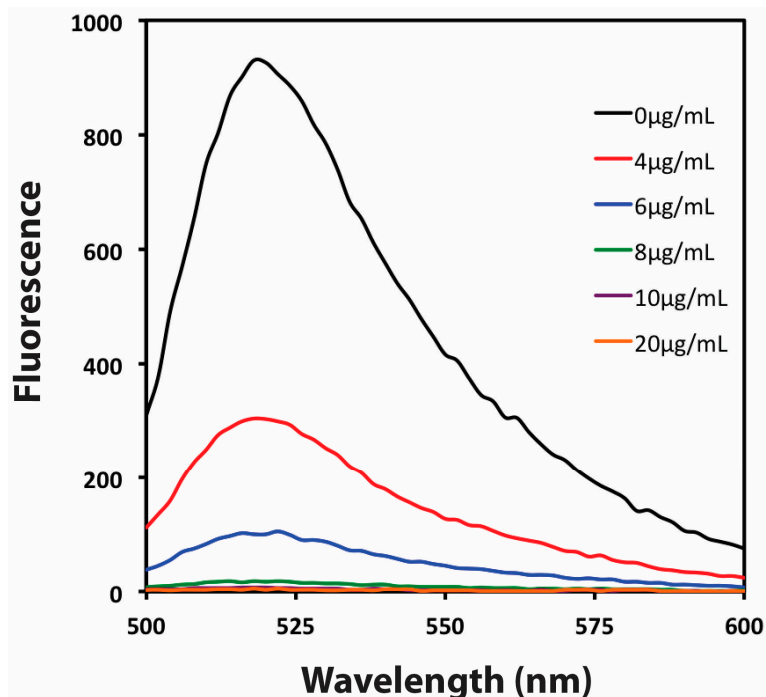

**Figure S1.** GO concentration testing for fluorescence quenching. FAM-labeled DNA biosensor (100 nM) was treated with different GO concentrations (0, 4, 6, 8, 10, 20 µg/mL). Fluorescence spectra were measured after 1 h incubation.

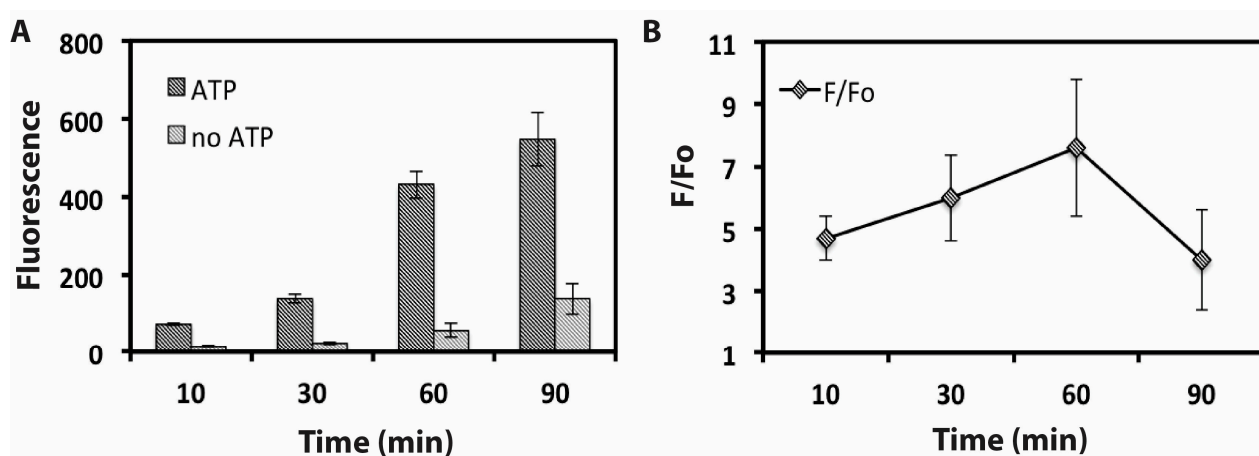

**Figure S2.** Time-dependent fluorescence responses. (A) The fluorescence vs. polymerization/nicking enzyme synergetic isothermal amplification time in the presence and absence of ATP; (B)  $F/F_0$  vs. the polymerization/nicking enzyme synergetic isothermal amplification time, where  $F$  is the fluorescence reading in the presence of ATP and  $F_0$  is the fluorescence reading in the absence of ATP. The ATP used in (A,B) is 500 µM. The error bar represents the standard deviation of three measurements.

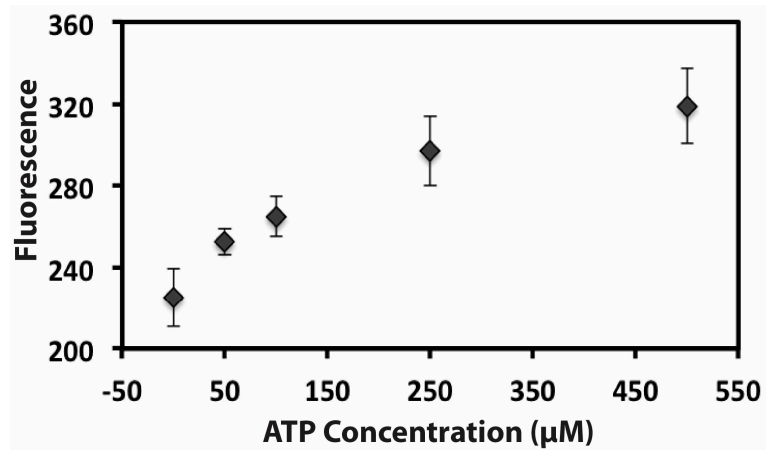

**Figure S3.** Fluorescence responses in real sample. The fluorescence responses for the biosensing system against ATP concentrations (0  $\mu\text{M}$ , 50  $\mu\text{M}$ , 100  $\mu\text{M}$ , 250  $\mu\text{M}$ , 500  $\mu\text{M}$  respectively) in 10% human serum. The data are an average of three independent experiments.

© 2015 by the authors; licensee MDPI, Basel, Switzerland. This article is an open access article distributed under the terms and conditions of the Creative Commons Attribution license (<http://creativecommons.org/licenses/by/4.0/>).
